# Supplementary material for: Rapid boron isotope and concentration measurements of silicate geological reference materials dissolved through sodium peroxide sintering
Source: Royal Society of Chemistry journal article supplement (doi:10.1039/d1ja00195g), 2021-01-01
Supplement: d1ja00195g1.xlsx [file d1ja00195g1.xlsx]

## Sheet: B ID Template
Weights							Measured and estimated data									Output					ID calculation
Lab ID	Sample name	Peroxide weight (g)	Sample weight (g)	Total sample solution (ml)	Actual Spike volume (g)	Actual ID aliquot (ml) or (g)	Estimated sample [B] (ppm)	Estimated sample d11B	Relative weighing error (%)	952 spike [B] ug/g	Peroxide B concentration (ug/g)	Measured 11B/10B of 951	Measured 11B/10B of spike+sample	1SE internal error	2SD external error	Ideal aliquot for B ID (ml)	Ideal Spike volume (ml)	Sample B (ppm) or (ug/g)	2SE combined error	Peroxide blank contribution	Mass fractionation corrected 11B/10B spike+sample	Estimated sample B (ng)	Estimated 11B/10B spike +sample	Sample 11B/10B	Estimated sample B (umol)	EstimatedSample 11B (umol)	Estimated Sample 10B (umol)	11B/10B Spike	Ideal 11B/10B spike+sample	Spike 11B (umol)	Spike 10B (umol)	Actual sample 10B (umol)	Total B (ug)	Blank corrected sample B (ug)
1	TEST	0.4874	0.0465	31.8337	0.057	0.24	164.068	1.17636	0.0067	2.17	0.042	4.583	0.44	2.51e-05	0.00319	0.125179	0.0233899	165.885	1.63769	0.00264682	0.388216	30	0.225746	4.04838	0.00277495	0.00222528	0.000549672	0.0532	0.464084	0.00062092	0.0116714	0.00106829	7.73412	7.71365

## Sheet: B IC data reduction template
Lab ID	Sample name	Blank-corrected d11B (per mil)	Combined 2SE (per mil)	[B] sample ppm (ug/g)	[B] 2SE ppm (ug/g)	Peroxide B%	Ammonia B%	Na2O2 (g)	peroxide [B]	peroxide d11B	Sample (g)	Stock solution (g)	IC aliquot (g)	11B/10B of bracketting 951	IC internal 2SE	IC external 2SD	Measured d11B	Ammonia [B] ppm	Ammonia (g)	Sodium Peroxide d11B	Ammonia d11B	Total sample B (ug)
1	TEST	-11.1944	0.644997	165.885	1.63769	0.00223382	0.000162782	1.1735	0.042	-5.53	0.1327	9.871	4.9466	4.6	0.000458	0.00293142	-11.1801	0.003	0.6	-5.53	-1.5	22.0129
