# Supplementary material for: Rapid boron isotope and concentration measurements of silicate geological reference materials dissolved through sodium peroxide sintering
Source: Royal Society of Chemistry journal article supplement (doi:10.1039/d1ja00195g), 2021-01-01

## Rapid B concentration and isotope measurements of silicate geological reference materials dissolved through sodium peroxide sintering

Yue Cai<sup>1\*</sup>, Troy Rasbury<sup>2</sup>, Kathleen Wooton<sup>2</sup>, Xin Jiang<sup>3</sup>, Di Wang<sup>4</sup>

<sup>1</sup>Lamont-Doherty Earth Observatory of Columbia University, 61 Rt. 9W, Palisades, NY 10964, USA

<sup>2</sup> Department of Geosciences, 255 Earth and Space Sciences Building, Stony Brook University, Stony Brook, NY 11794-2100, USA

<sup>3</sup> China University of Geosciences, Wuhan, China

<sup>4</sup> State Key Laboratory for Mineral Deposits Research, School of Earth Sciences and Engineering, Nanjing University, 168 Xianlin Avenue, Qixia District, Nanjing 210046, China

### Supplemental

Images of our

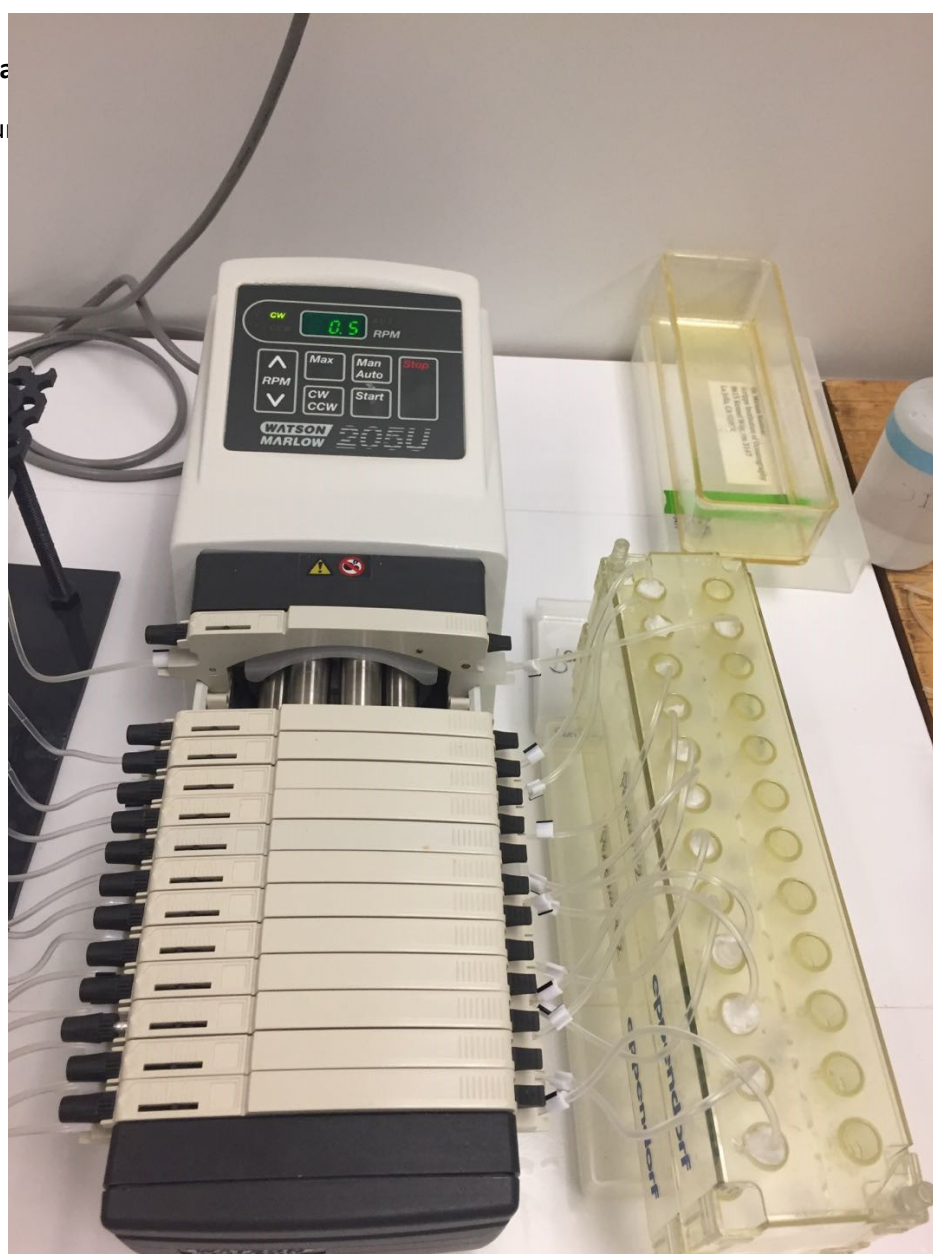

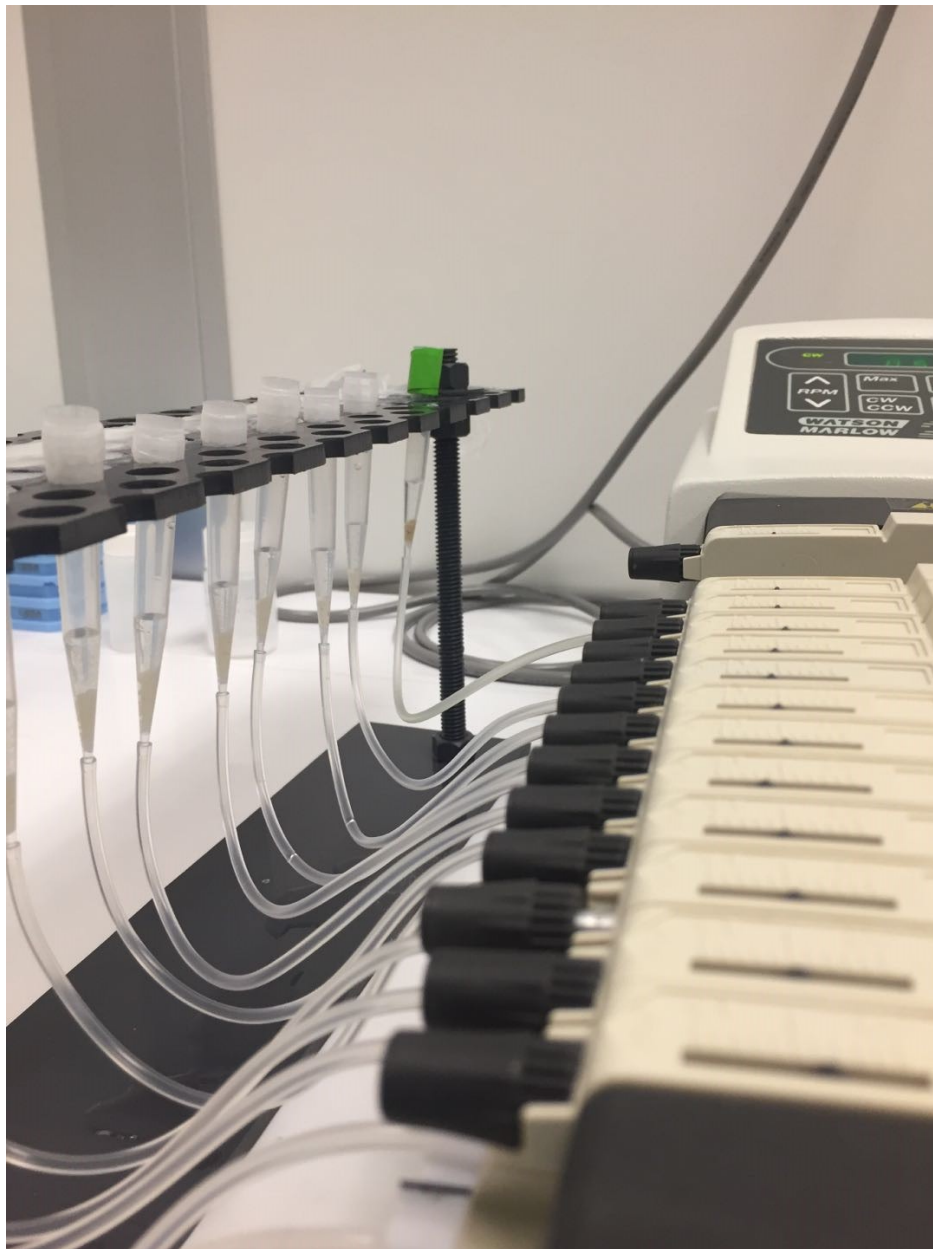

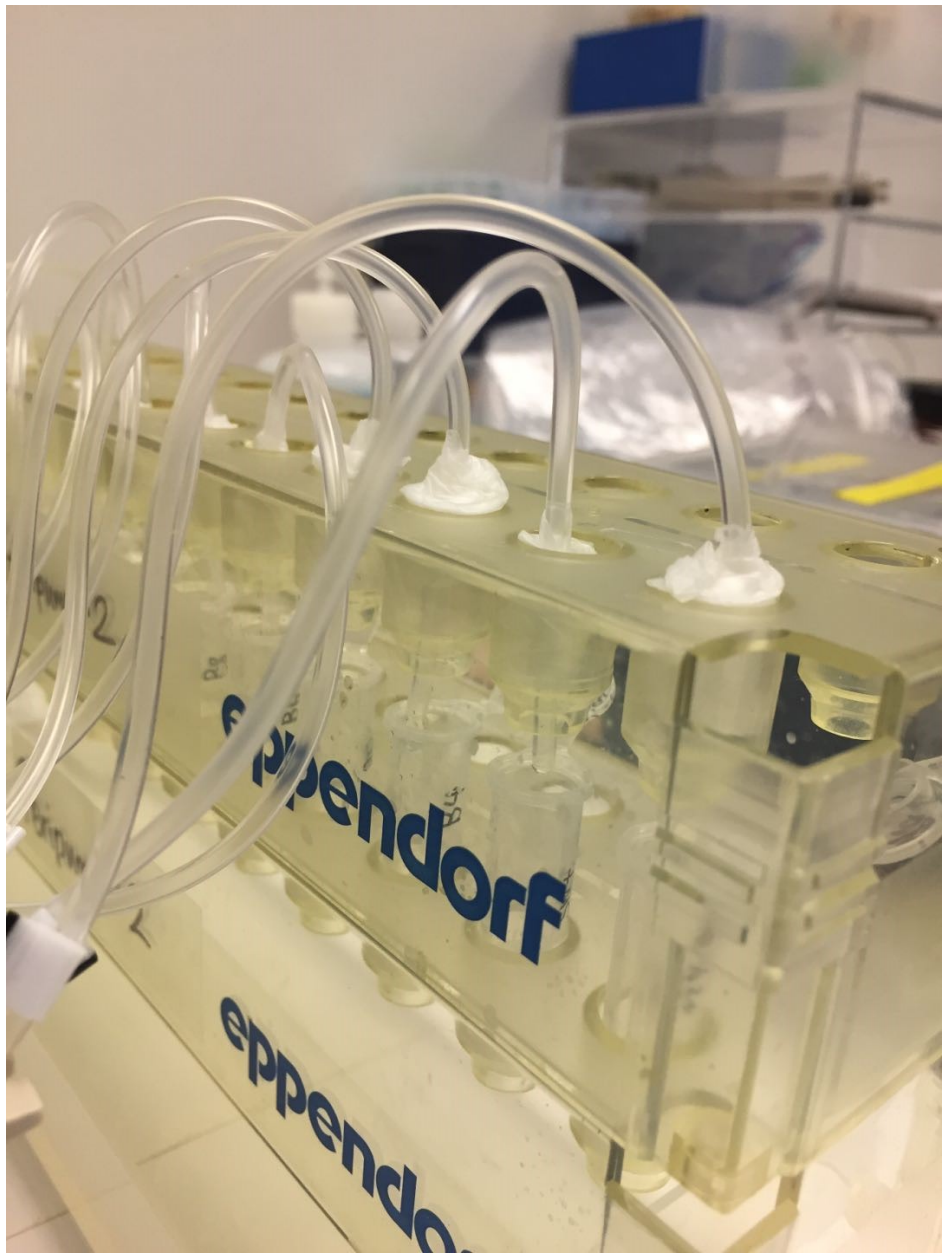

Supplement: d1ja00195g2.pdf [file d1ja00195g2.pdf]
